# Supplementary material for: Donor–acceptor copolymers containing bithiophene and dithiophenylthienothiadiazole units with fast electrochromic response
Source: Royal Society of Chemistry journal article supplement (doi:10.1039/c9tc01105f), 2019-01-01
Supplement: c9tc01105f1.pdf [file c9tc01105f1.pdf]

## Supporting Information for

### Donor-acceptor copolymers containing bithiophene and dithiophenylthienothiadiazole units with fast electrochromic response

Věra Cimrová, \* Drahomír Výprachtický, Veronika Pokorná

Institute of Macromolecular Chemistry, Czech Academy of Sciences,  
Heyrovsky Sq. 2, 16206 Prague 6, Czech Republic

\*Corresponding author. Tel.: +420296809251.

E-mail address: cimrova@imc.cas.cz

| Content:                                                                                                                                                                                                                                                        | page |
|-----------------------------------------------------------------------------------------------------------------------------------------------------------------------------------------------------------------------------------------------------------------|------|
| <b>Figure S1:</b> <sup>1</sup> H NMR spectrum of 3,3'-didodecyl-2,2'-bithiophene ( <b>1</b> ) in CDCl <sub>3</sub> . ....                                                                                                                                       | 2    |
| <b>Figure S2:</b> <sup>13</sup> C NMR spectrum of 3,3'-didodecyl-2,2'-bithiophene ( <b>1</b> ) in CDCl <sub>3</sub> . ....                                                                                                                                      | 2    |
| <b>Figure S3:</b> <sup>1</sup> H NMR spectrum of 3,3'-didodecyl-5,5'-tributylstannyl-2,2'-bithiophene ( <b>2</b> )<br>in deuterated THF. ....                                                                                                                   | 3    |
| <b>Figure S4:</b> <sup>13</sup> C NMR spectrum of 3,3'-didodecyl-5,5'-tributylstannyl-2,2'-bithiophene ( <b>2</b> )<br>in deuterated THF. ....                                                                                                                  | 3    |
| <b>Figure S5:</b> <sup>1</sup> H NMR spectrum of poly[4,6-bis(3'-dodecylthiophen-2'-yl)thieno[3,4- <i>c</i> ][1,2,5]-<br>thiadiazole-5',5'-diyl- <i>alt</i> -3,3'-didodecyl-2,2'-bithiophene-5,5'-diyl] ( <b>CDTDBT</b> ) in CDCl <sub>3</sub> . ...            | 4    |
| <b>Figure S6:</b> <sup>13</sup> C NMR spectrum of poly[4,6-bis(3'-dodecylthiophen-2'-yl)thieno[3,4- <i>c</i> ][1,2,5]-<br>thiadiazole-5',5'-diyl- <i>alt</i> -3,3'-didodecyl-2,2'-bithiophene-5,5'-diyl] ( <b>CDTDBT</b> ) in CDCl <sub>3</sub> . ...           | 4    |
| <b>Figure S7:</b> <sup>1</sup> H NMR spectrum of poly[4,6-bis(3'-(2-ethylhexyl)thiophen-2'-yl)thieno[3,4-<br><i>c</i> ][1,2,5]thiadiazole-5',5'-diyl- <i>alt</i> -3,3'-didodecyl-2,2'-bithiophene-5,5'-diyl] ( <b>CEHTDBT</b> ) in<br>CDCl <sub>3</sub> . ....  | 5    |
| <b>Figure S8:</b> <sup>13</sup> C NMR spectrum of poly[4,6-bis(3'-(2-ethylhexyl)thiophen-2'-yl)thieno[3,4-<br><i>c</i> ][1,2,5]thiadiazole-5',5'-diyl- <i>alt</i> -3,3'-didodecyl-2,2'-bithiophene-5,5'-diyl] ( <b>CEHTDBT</b> ) in<br>CDCl <sub>3</sub> . .... | 5    |

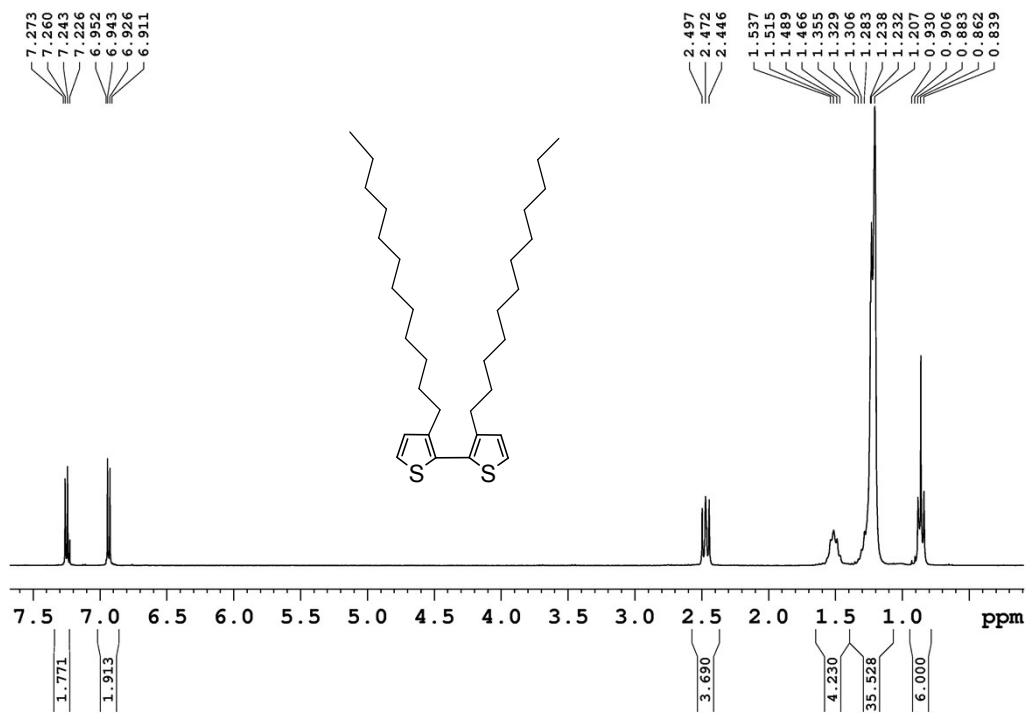

**Figure S1:**  $^1\text{H}$  NMR spectrum of 3,3'-didodecyl-2,2'-bithiophene (**1**) in  $\text{CDCl}_3$ .

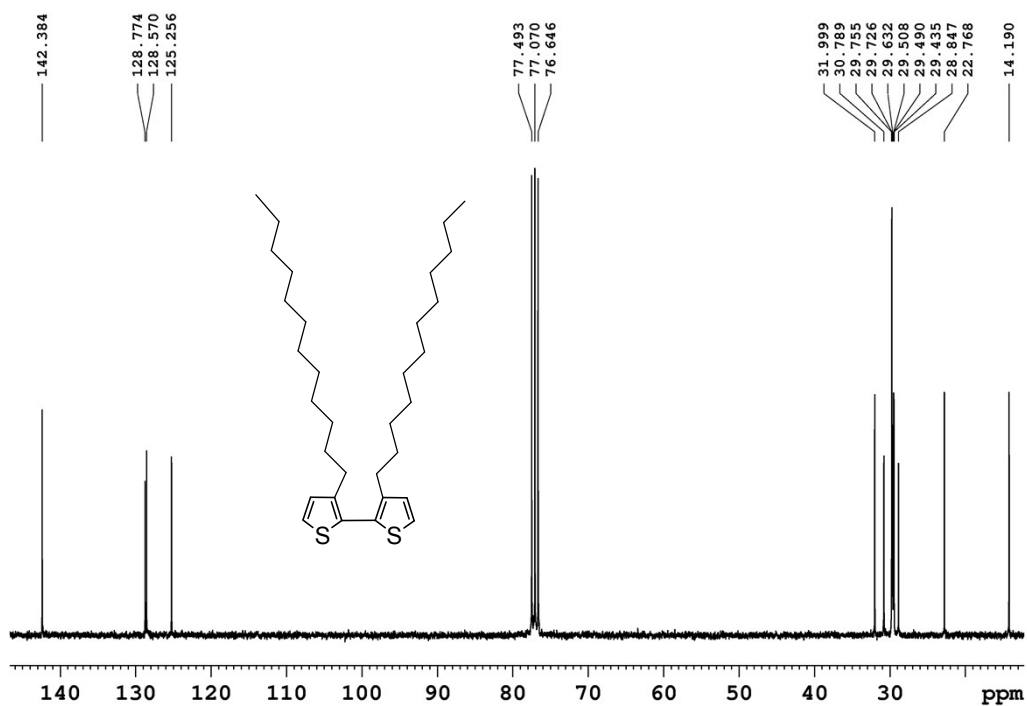

**Figure S2:**  $^{13}\text{C}$  NMR spectrum of 3,3'-didodecyl-2,2'-bithiophene (**1**) in  $\text{CDCl}_3$ .

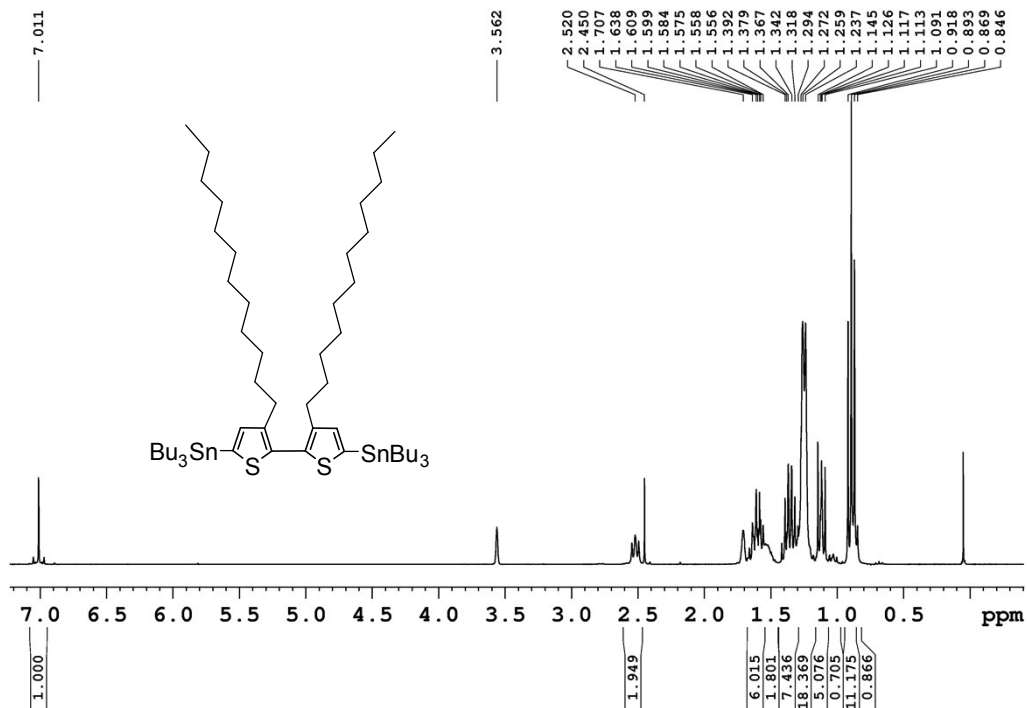

**Figure S3:** <sup>1</sup>H NMR spectrum of 3,3'-didodecyl-5,5'-tributylstannyl-2,2'-bithiophene (**2**) in deuterated tetrahydrofuran.

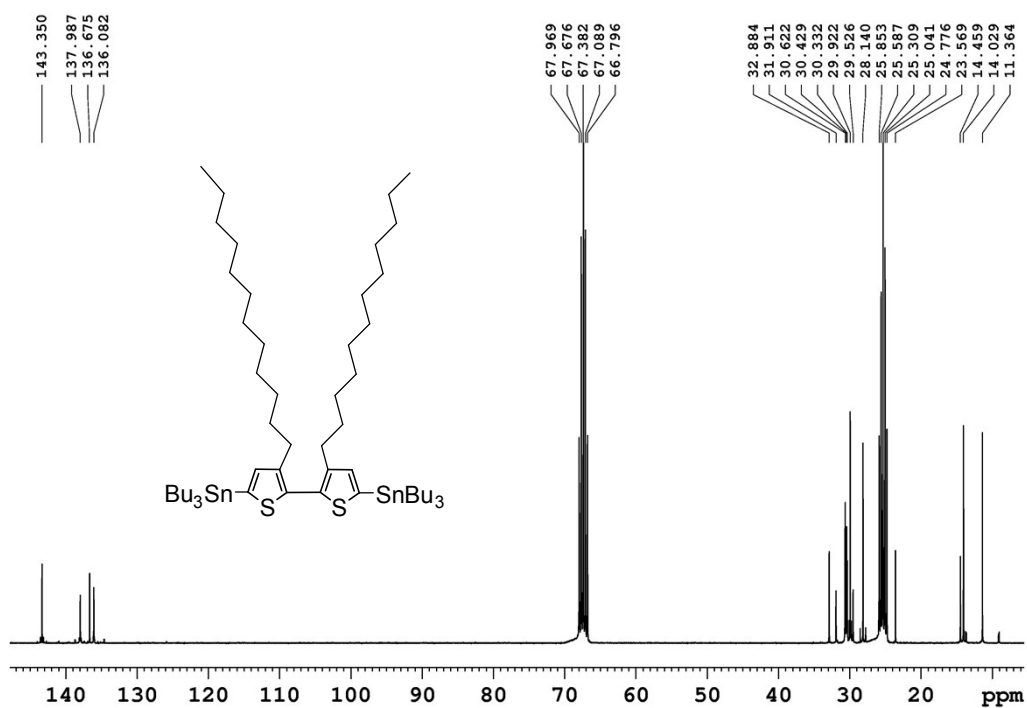

**Figure S4:** <sup>13</sup>C NMR spectrum of 3,3'-didodecyl-5,5'-tributylstannyl-2,2'-bithiophene (**2**) in deuterated tetrahydrofuran.

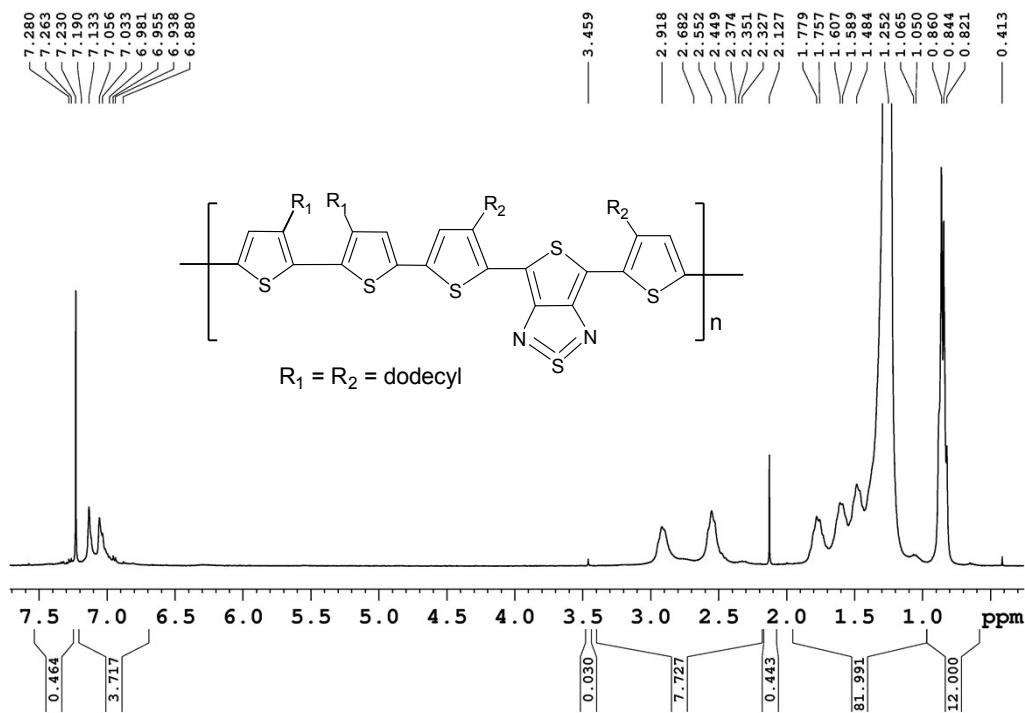

**Figure S5:**  $^1\text{H NMR}$  spectrum of poly[4,6-bis(3'-dodecylthiophen-2'-yl)thieno[3,4-c][1,2,5]thiadiazole-5',5'-diyl-alt-3,3'-didodecyl-2,2'-bithiophene-5,5'-diyl] (**CDTDBT**) in  $\text{CDCl}_3$ .

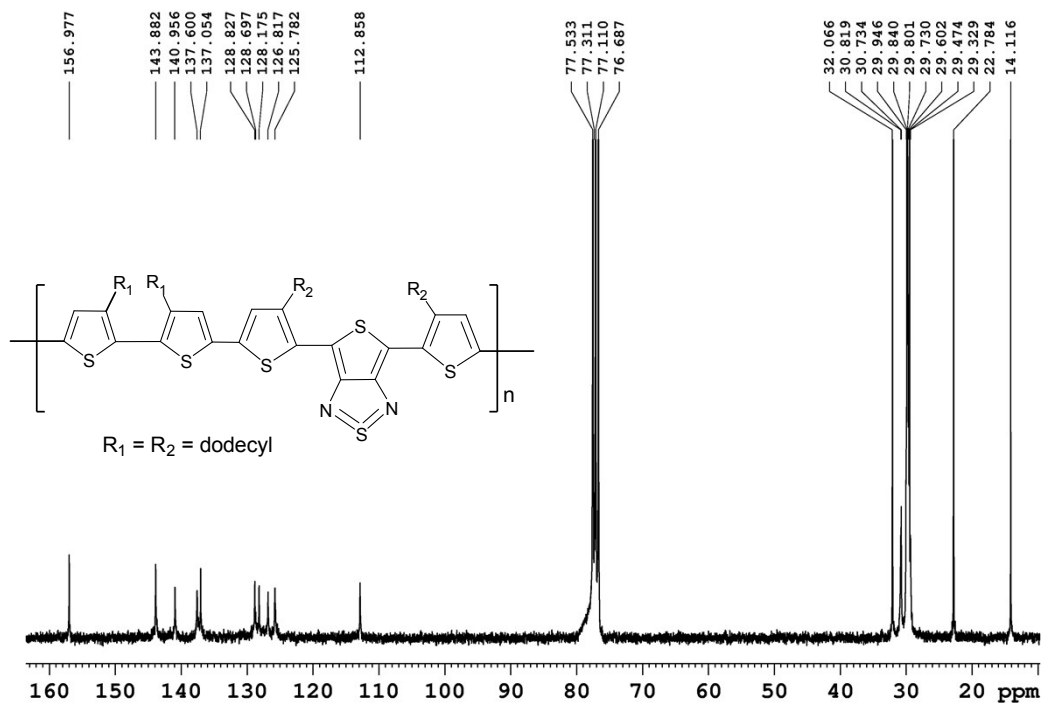

**Figure S6:**  $^{13}\text{C NMR}$  spectrum of poly[4,6-bis(3'-dodecylthiophen-2'-yl)thieno[3,4-c][1,2,5]thiadiazole-5',5'-diyl-alt-3,3'-didodecyl-2,2'-bithiophene-5,5'-diyl] (**CDTDBT**) in  $\text{CDCl}_3$ .

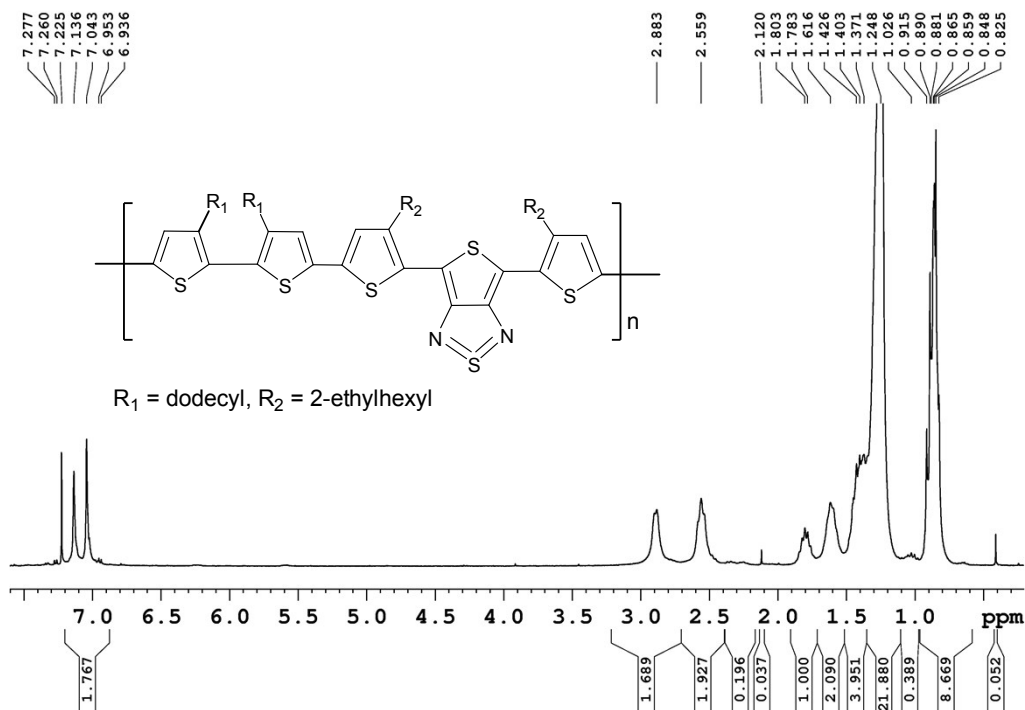

**Figure S7:**  $^1\text{H NMR}$  spectrum of poly[4,6-bis(3'-(2-ethylhexyl)thiophen-2'-yl)thieno[3,4-c][1,2,5]thiadiazole-5',5'-diyl-*alt*-3,3'-didodecyl-2,2'-bithiophene-5,5'-diyl] (CEHTDBT) in  $\text{CDCl}_3$ .

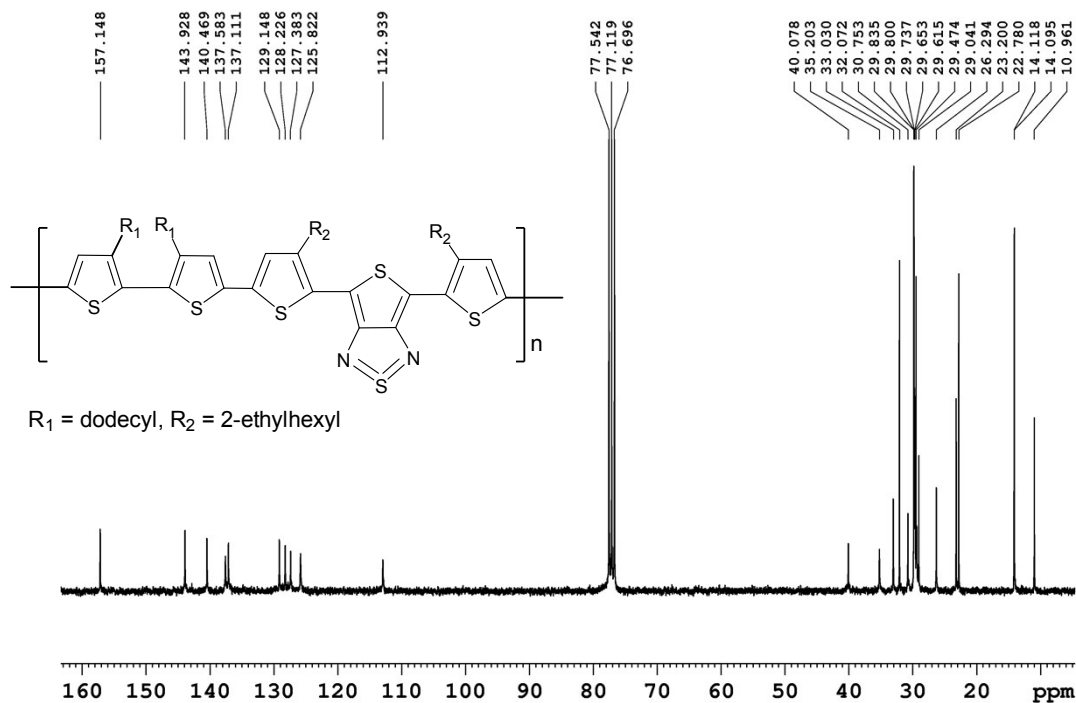

**Figure S8:**  $^{13}\text{C NMR}$  spectrum of poly[4,6-bis(3'-(2-ethylhexyl)thiophen-2'-yl)thieno[3,4-c][1,2,5]thiadiazole-5',5'-diyl-*alt*-3,3'-didodecyl-2,2'-bithiophene-5,5'-diyl] (CEHTDBT) in  $\text{CDCl}_3$ .
